# Supplementary material
Source: PubMed Central journal article supplement (PMC4065799)
Supplement: NIHMS558798-supplement-supplement_1.pdf [file NIHMS558798-supplement-supplement_1.pdf]

Supplementary Table 1. Clinical characteristics of type 2 diabetic patients

|                                 | Controls     |  |       | Type 2 Diabetics |                       |       |                    |
|---------------------------------|--------------|--|-------|------------------|-----------------------|-------|--------------------|
|                                 |              |  | p     | All              | Without Complications | p     | With Complications |
| N                               | 45           |  |       | 80               | 36                    |       | 44                 |
| Sex (%male)                     | 59.3%        |  | 0.300 | 49.4%            | 39.6%                 | 0.026 | 65.6%              |
| Ethnicity (%white)              | 79.6%        |  | 0.088 | 65.9%            | 62.3%                 | 0.480 | 71.9%              |
| Age (years)                     | 43 ± 13      |  | 0.000 | 52 ± 9           | 50 ± 9                | 0.028 | 55 ± 7             |
| Blood pressure (mmHg)           |              |  |       |                  |                       |       |                    |
| Systolic                        | 124 ± 16     |  | 0.020 | 132 ± 20         | 128 ± 17              | 0.046 | 138 ± 23           |
| Diastolic                       | 79 ± 9       |  | 0.260 | 81 ± 14          | 80 ± 11               | 0.330 | 83 ± 18            |
| Hypertension (%Dx)              | 7.7%         |  | 0.000 | 40.5%            | 25.0%                 | 0.000 | 65.6%              |
| LAE(mL/mmHg x 10)               | 18.8 ± 5.4   |  | 0.048 | 16.8 ± 5.9       | 16.5 ± 5.3            | 0.540 | 17.3 ± 6.7         |
| SAE(mL/mmHg x 10)               | 8.3 ± 4.0    |  | 0.000 | 6.0 ± 3.2        | 6.3 ± 3.1             | 0.250 | 5.5 ± 3.4          |
| Duration of DM (years)          |              |  |       | 7 ± 8            | 6 ± 8                 | 0.580 | 8 ± 10             |
| BMI (kg/m2)                     | 28.3 ± 6.0   |  | 0.000 | 37.0 ± 8.4       | 36.5 ± 7.6            | 0.470 | 37.9 ± 9.7         |
| HbA1c (%)                       | 5.2 ± 0.4    |  | 0.000 | 7.7 ± 1.8        | 7.4 ± 1.6             | 0.081 | 8.1 ± 2.0          |
| Fasting Glucose (mg/dL)         | 88.1 ± 10.6  |  | 0.000 | 141.6 ± 68.5     | 127.0 ± 53.4          | 0.026 | 165.6 ± 83.5       |
| Serum Creatinine (mmol/L)       | 0.9 ± 0.2    |  | 0.350 | 1.0 ± 0.7        | 1.0 ± 0.9             | 0.770 | 0.9 ± 0.2          |
| ACR (mg/mmol)                   | 9.5 ± 17.6   |  | 0.001 | 34.8 ± 69.4      | 10.9 ± 7.4            | 0.001 | 74.3 ± 101.9       |
| AST (units/L)                   | 26.1 ± 8.0   |  | 0.120 | 28.7 ± 11.1      | 27.6 ± 9.1            | 0.270 | 30.6 ± 13.8        |
| ALT (units/L)                   | 31.3 ± 12.6  |  | 0.610 | 33.2 ± 15.3      | 32.0 ± 14.4           | 0.320 | 39.6 ± 20.2        |
| Total Cholesterol (mmol/L)      | 180.3 ± 37.1 |  | 0.480 | 185.3 ± 42.1     | 184.2 ± 39.2          | 0.760 | 187.1 ± 47.1       |
| Triglycerides (mmol/L)          | 94.9 ± 58.3  |  | 0.000 | 176.6 ± 135.2    | 153.0 ± 105.1         | 0.039 | 216.1 ± 169.2      |
| LDL Cholesterol (mmol/L)        | 113.5 ± 32.1 |  | 0.560 | 110.0 ± 35.4     | 113.1 ± 34.5          | 0.310 | 104.6 ± 36.9       |
| HDL Cholesterol (mmol/L)        | 47.8 ± 15.6  |  | 0.013 | 41.7 ± 10.7      | 42.4 ± 11.6           | 0.480 | 40.6 ± 8.8         |
| Smoking (%current)              | 15.1%        |  | 0.990 | 16.5%            | 15.1%                 | 0.770 | 18.8%              |
| Alcohol use (%none)             | 50.9%        |  | 0.38  | 59.5%            | 55.8%                 | 0.490 | 65.6%              |
| Vitamin use (%yes)              | 31.5%        |  | 0.079 | 47.1%            | 47.2%                 | 0.990 | 46.9%              |
| Lipid drug use (%yes)           | 3.8%         |  | 0.000 | 36.5%            | 22.6%                 | 0.001 | 59.4%              |
| BP drug use (%yes)              | 7.4%         |  | 0.000 | 56.0%            | 42.3%                 | 0.001 | 78.1%              |
| Aspirin use (%yes)              | 11.5%        |  | 0.000 | 43.5%            | 35.8%                 | 0.075 | 56.3%              |
| Microvascular complications (%) | 0%           |  | 0.000 | 32.9%            | 0%                    | 0.000 | 87.5%              |
| peripheral neuropathy           | 0%           |  | 0.000 | 18.1%            | 0%                    | 0.000 | 46.9%              |
| retinopathy                     | 0%           |  | 0.006 | 11.8%            | 0%                    | 0.000 | 31.2%              |
| nephropathy                     | 0%           |  | 0.005 | 20.0%            | 0%                    | 0.000 | 53.1%              |
| autonomic dysfunction           | 0%           |  | 0.290 | 3.6%             | 0%                    | 0.054 | 9.4%               |
| Macro Vasc complications        | 0%           |  | 0.006 | 11.8%            | 0%                    | 0.000 | 31.3%              |
| PVD                             | 0%           |  | 0.300 | 4.7%             | 0%                    | 0.018 | 12.5%              |

BP = blood pressure; LAE = large artery elasticity; SAE = small artery elasticity; BMI = body mass index; ACR = albumin-to-creatinine ratio; AST = aspartate aminotransferase; ALT = alanine aminotransferase; Cx = complications

**Supplementary Table 2. Clinical correlations between serum kallistatin levels and HbA1c, albumin-to-creatinine ratio, large artery elasticity, and small artery elasticity.**

**Supplemental Table 2 (continued), Non-diabetic control subjects, N=45**

|        |                     | KS    | HbA1c | ACR   | LAE   | SAE   | logKS | logACR | logLAE | logSAE |
|--------|---------------------|-------|-------|-------|-------|-------|-------|--------|--------|--------|
| KS     | Pearson Correlation | 1     | -.150 | .194  | .065  | -.080 | .938  | .211   | .113   | -.053  |
|        | Sig. (2-tailed)     |       | .285  | .164  | .651  | .575  | .000  | .168   | .431   | .711   |
| HbA1c  | Pearson Correlation | -.150 | 1     | .327  | -.055 | -.112 | -.133 | .206   | -.045  | -.202  |
|        | Sig. (2-tailed)     | .285  |       | .017  | .705  | .438  | .344  | .179   | .754   | .158   |
| ACR    | Pearson Correlation | .194  | .327  | 1     | .060  | -.216 | .237  | .846   | .088   | -.321  |
|        | Sig. (2-tailed)     | .164  | .017  |       | .679  | .132  | .088  | .000   | .542   | .023   |
| LAE    | Pearson Correlation | .065  | -.055 | .060  | 1     | .327  | .055  | -.007  | .970   | .337   |
|        | Sig. (2-tailed)     | .651  | .705  | .679  |       | .019  | .700  | .963   | .000   | .016   |
| SAE    | Pearson Correlation | -.080 | -.112 | -.216 | .327  | 1     | -.121 | -.269  | .393   | .946   |
|        | Sig. (2-tailed)     | .575  | .438  | .132  | .019  |       | .397  | .089   | .004   | .000   |
| logKS  | Pearson Correlation | .938  | -.133 | .237  | .055  | -.121 | 1     | .286   | .103   | -.088  |
|        | Sig. (2-tailed)     | .000  | .344  | .088  | .700  | .397  |       | .060   | .471   | .541   |
| logACR | Pearson Correlation | .211  | .206  | .846  | -.007 | -.269 | .286  | 1      | .026   | -.312  |
|        | Sig. (2-tailed)     | .168  | .179  | .000  | .963  | .089  | .060  |        | .874   | .047   |
| logLAE | Pearson Correlation | .113  | -.045 | .088  | .970  | .393  | .103  | .026   | 1      | .399   |
|        | Sig. (2-tailed)     | .431  | .754  | .542  | .000  | .004  | .471  | .874   |        | .004   |
| logSAE | Pearson Correlation | -.053 | -.202 | -.321 | .337  | .946  | -.088 | -.312  | .399   | 1      |
|        | Sig. (2-tailed)     | .711  | .158  | .023  | .016  | .000  | .541  | .047   | .004   |        |

Supplemental Table 2 (continued), Diabetics (all), N=80

|        |                     | KS    | HbA1c | ACR   | LAE   | SAE   | logKS | logACR | logLAE | logSAE |
|--------|---------------------|-------|-------|-------|-------|-------|-------|--------|--------|--------|
| KS     | Pearson Correlation | 1     | .280  | .316  | .036  | -.119 | .959  | .221   | .043   | -.139  |
|        | Sig. (2-tailed)     |       | .009  | .003  | .746  | .278  | .000  | .045   | .697   | .203   |
| HbA1c  | Pearson Correlation | .280  | 1     | .210  | -.075 | -.076 | .245  | .298   | -.145  | -.139  |
|        | Sig. (2-tailed)     | .009  |       | .053  | .497  | .490  | .024  | .006   | .184   | .203   |
| ACR    | Pearson Correlation | .316  | .210  | 1     | .041  | -.156 | .267  | .834   | -.003  | -.173  |
|        | Sig. (2-tailed)     | .003  | .053  |       | .710  | .153  | .013  | .000   | .982   | .113   |
| LAE    | Pearson Correlation | .036  | -.075 | .041  | 1     | .413  | .075  | .014   | .974   | .423   |
|        | Sig. (2-tailed)     | .746  | .497  | .710  |       | .000  | .498  | .898   | .000   | .000   |
| SAE    | Pearson Correlation | -.119 | -.076 | -.156 | .413  | 1     | -.138 | -.257  | .431   | .954   |
|        | Sig. (2-tailed)     | .278  | .490  | .153  | .000  |       | .209  | .019   | .000   | .000   |
| logKS  | Pearson Correlation | .959  | .245  | .267  | .075  | -.138 | 1     | .179   | .092   | -.159  |
|        | Sig. (2-tailed)     | .000  | .024  | .013  | .498  | .209  |       | .105   | .403   | .145   |
| logACR | Pearson Correlation | .221  | .298  | .834  | .014  | -.257 | .179  | 1      | -.036  | -.264  |
|        | Sig. (2-tailed)     | .045  | .006  | .000  | .898  | .019  | .105  |        | .747   | .016   |
| logLAE | Pearson Correlation | .043  | -.145 | -.003 | .974  | .431  | .092  | -.036  | 1      | .454   |
|        | Sig. (2-tailed)     | .697  | .184  | .982  | .000  | .000  | .403  | .747   |        | .000   |
| logSAE | Pearson Correlation | -.139 | -.139 | -.173 | .423  | .954  | -.159 | -.264  | .454   | 1      |
|        | Sig. (2-tailed)     | .203  | .203  | .113  | .000  | .000  | .145  | .016   | .000   |        |



**Supplemental Table 2 (continued), Diabetic without complications, N=36**

|        |                     | KS    | HbA1c | ACR   | LAE   | SAE   | logKS | logACR | logLAE | logSAE |
|--------|---------------------|-------|-------|-------|-------|-------|-------|--------|--------|--------|
| KS     | Pearson Correlation | 1     | .485  | .281  | -.306 | -.082 | .958  | .185   | -.293  | -.101  |
|        | Sig. (2-tailed)     |       | .005  | .119  | .088  | .654  | .000  | .312   | .104   | .583   |
| HbA1c  | Pearson Correlation | .485  | 1     | .184  | -.080 | .151  | .494  | .270   | -.156  | .017   |
|        | Sig. (2-tailed)     | .005  |       | .312  | .662  | .409  | .004  | .135   | .395   | .927   |
| ACR    | Pearson Correlation | .281  | .184  | 1     | .025  | -.153 | .230  | .855   | -.023  | -.167  |
|        | Sig. (2-tailed)     | .119  | .312  |       | .890  | .404  | .205  | .000   | .901   | .360   |
| LAE    | Pearson Correlation | -.306 | -.080 | .025  | 1     | .560  | -.285 | .035   | .973   | .584   |
|        | Sig. (2-tailed)     | .088  | .662  | .890  |       | .001  | .114  | .849   | .000   | .000   |
| SAE    | Pearson Correlation | -.082 | .151  | -.153 | .560  | 1     | -.066 | -.224  | .545   | .937   |
|        | Sig. (2-tailed)     | .654  | .409  | .404  | .001  |       | .719  | .219   | .001   | .000   |
| logKS  | Pearson Correlation | .958  | .494  | .230  | -.285 | -.066 | 1     | .121   | -.260  | -.081  |
|        | Sig. (2-tailed)     | .000  | .004  | .205  | .114  | .719  |       | .509   | .150   | .660   |
| logACR | Pearson Correlation | .185  | .270  | .855  | .035  | -.224 | .121  | 1      | -.023  | -.253  |
|        | Sig. (2-tailed)     | .312  | .135  | .000  | .849  | .219  | .509  |        | .902   | .162   |
| logLAE | Pearson Correlation | -.293 | -.156 | -.023 | .973  | .545  | -.260 | -.023  | 1      | .604   |
|        | Sig. (2-tailed)     | .104  | .395  | .901  | .000  | .001  | .150  | .902   |        | .000   |
| logSAE | Pearson Correlation | -.101 | .017  | -.167 | .584  | .937  | -.081 | -.253  | .604   | 1      |
|        | Sig. (2-tailed)     | .583  | .927  | .360  | .000  | .000  | .660  | .162   | .000   |        |

**Diabetics with complications, N=44**

|       |                     | KS    | HbA1c | ACR   | LAE   | SAE   | logKS | logACR | logLAE | logSAE |
|-------|---------------------|-------|-------|-------|-------|-------|-------|--------|--------|--------|
| KS    | Pearson Correlation | 1     | -.037 | -.140 | .376  | -.087 | .964  | -.175  | .380   | -.094  |
|       | Sig. (2-tailed)     |       | .791  | .316  | .006  | .537  | .000  | .219   | .005   | .504   |
| HbA1c | Pearson Correlation | -.037 | 1     | .241  | -.098 | -.216 | -.063 | .235   | -.155  | -.215  |
|       | Sig. (2-tailed)     | .791  |       | .082  | .487  | .121  | .654  | .096   | .266   | .122   |

|        |                     |       |       |       |       |       |       |       |       |       |
|--------|---------------------|-------|-------|-------|-------|-------|-------|-------|-------|-------|
| ACR    | Pearson Correlation | -.140 | .241  | 1     | -.079 | -.218 | -.132 | .968  | -.088 | -.182 |
|        | Sig. (2-tailed)     | .316  | .082  |       | .574  | .117  | .348  | .000  | .530  | .191  |
| LAE    | Pearson Correlation | .376  | -.098 | -.079 | 1     | .319  | .361  | -.132 | .975  | .329  |
|        | Sig. (2-tailed)     | .006  | .487  | .574  |       | .020  | .008  | .355  | .000  | .016  |
| SAE    | Pearson Correlation | -.087 | -.216 | -.218 | .319  | 1     | -.132 | -.276 | .359  | .965  |
|        | Sig. (2-tailed)     | .537  | .121  | .117  | .020  |       | .345  | .050  | .008  | .000  |
| logKS  | Pearson Correlation | .964  | -.063 | -.132 | .361  | -.132 | 1     | -.158 | .377  | -.145 |
|        | Sig. (2-tailed)     | .000  | .654  | .348  | .008  | .345  |       | .269  | .005  | .300  |
| logACR | Pearson Correlation | -.175 | .235  | .968  | -.132 | -.276 | -.158 | 1     | -.151 | -.221 |
|        | Sig. (2-tailed)     | .219  | .096  | .000  | .355  | .050  | .269  |       | .290  | .119  |
| logLAE | Pearson Correlation | .380  | -.155 | -.088 | .975  | .359  | .377  | -.151 | 1     | .363  |
|        | Sig. (2-tailed)     | .005  | .266  | .530  | .000  | .008  | .005  | .290  |       | .007  |
| logSAE | Pearson Correlation | -.094 | -.215 | -.182 | .329  | .965  | -.145 | -.221 | .363  | 1     |
|        | Sig. (2-tailed)     | .504  | .122  | .191  | .016  | .000  | .300  | .119  | .007  |       |

HbA1c= glycosylated hemoglobin; ACR = albumin-to-creatinine ratio; LAE = large artery elasticity; SAE = small artery elasticity. Combined male and female data shown. Pearson Correlations and P-values are indicated.

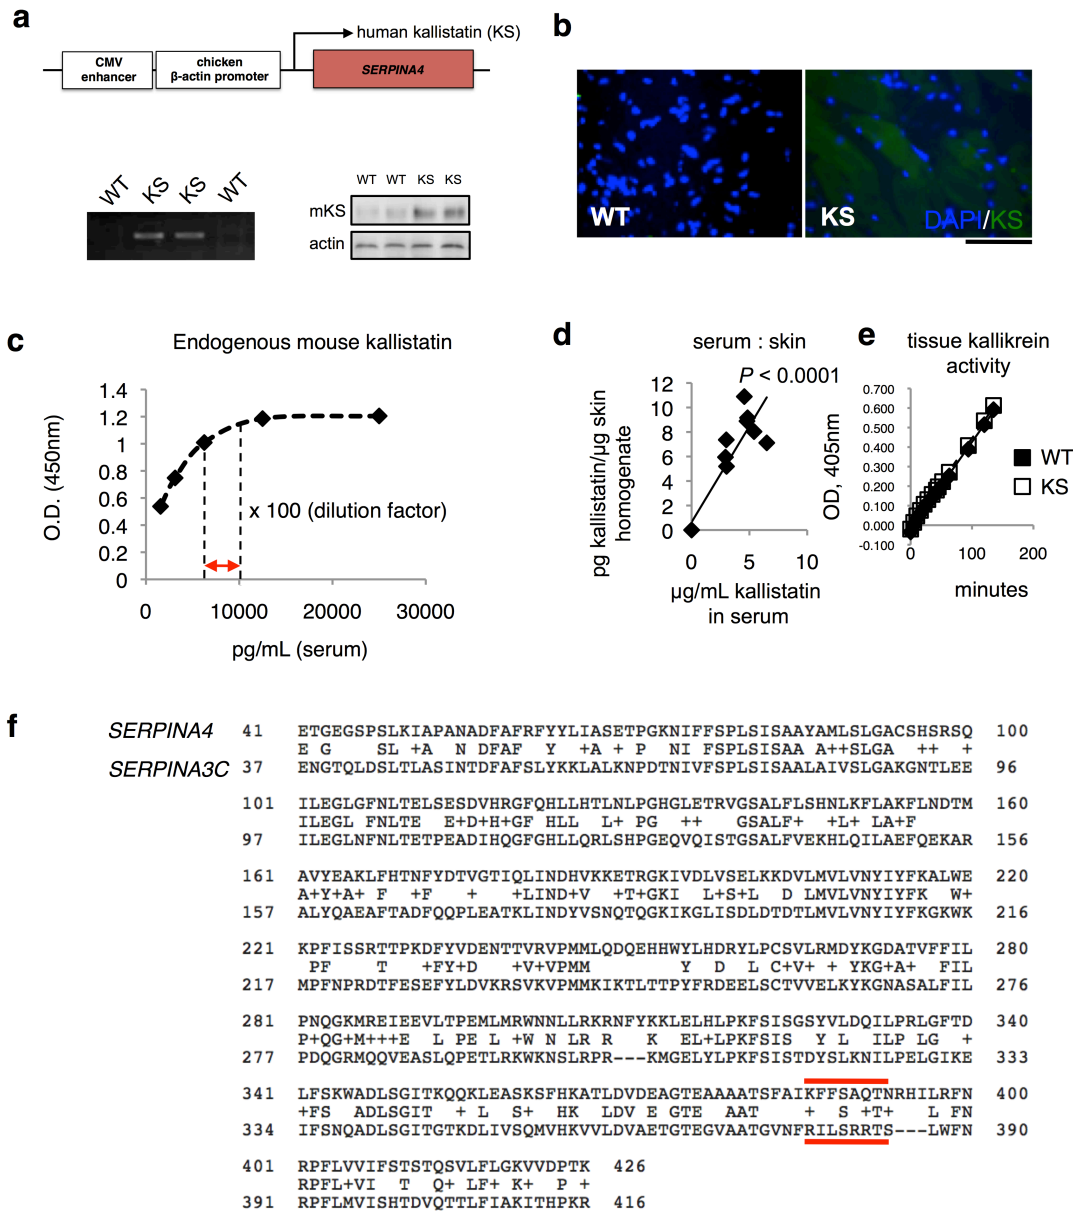

**Supplemental Figure 1. Generation of KS-TG mice overexpressing kallistatin.** (a) Transgene construct for human kallistatin. Shown below are genotyping and Western blotting in tissue using antibody recognizing both mouse and human kallistatin. (b) Images of WT and KS-TG mouse tissue (in this case wound beds at day 7) immunostained with an FITC-conjugated monoclonal antibody specific for human kallistatin in wound beds. Scale bar = 50  $\mu$ m. (c) ELISA detecting endogenous mouse kallistatin (recombinant SERPINA3C). Vertical dotted lines delineate range of kallistatin detectable in serum of 3-month-old WT C57BL/6 mice diluted 1:100, indicating endogenous mouse kallistatin concentrations to be approximately 1  $\mu$ g/mL in sera. (d) Serum levels of human kallistatin correlate with its levels in the skin, as measured in an ELISA that recognizes and measures only human kallistatin (pg/mg total protein). (e) Tissue kallikrein activity detectable in serum (n=21 WT; n=36 KS-TG mice). (f) Amino acid sequence alignment of human kallistatin (SERPINA4) and mouse kallistatin (SERPINA3C). Red lines indicate residues for interactions with human tissue kallikrein and mouse tissue kallikrein.

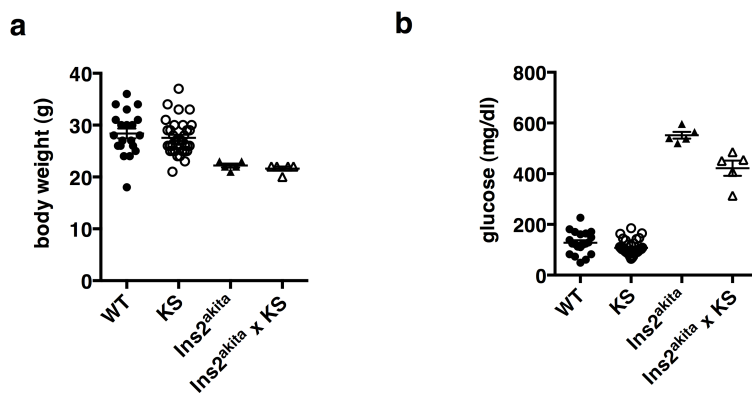

**Supplemental Figure 2. No significant differences in adult body weight or blood glucose levels between adult WT littermates and KS-TG mice and between  $Ins2^{akita}$  and  $Ins2^{akita} \times KS$ -TG mice. (a) Body weight and (b) blood glucose concentrations of 3-month-old male WT (n=20), KS-TG (n=33),  $Ins2^{akita}$  (n= 5) and  $Ins2^{akita} \times KS$ -TG (n=5) mice.**

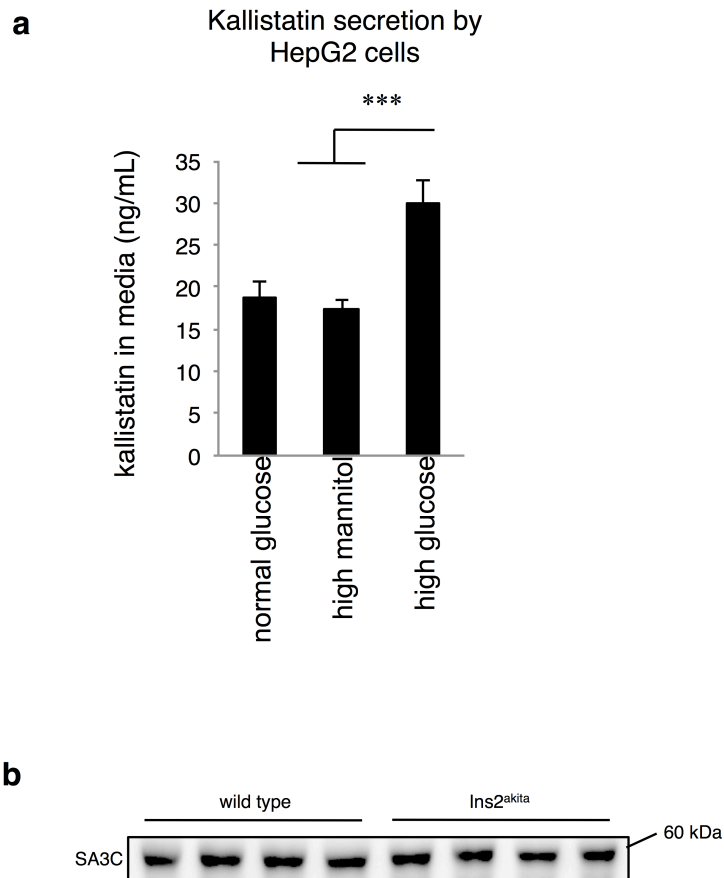

**Supplemental Figure 3. High glucose induces immediate secretion of human kallistatin in liver-derived cells, but 3-month-old hyperglycemic *Ins2<sup>akita</sup>* mice do not have higher levels of endogenous kallistatin in circulation. (a)** Quantification of kallistatin secreted from HepG2 cells treated with normal glucose (5 mM), high mannitol (5 mM glucose + 20 mM mannitol), or high glucose (25 mM glucose) for 24 hr. **(b)** Western blot analysis of endogenous mouse kallistatin (SA3C) using sera from 3-month-old WT and *Ins2<sup>akita</sup>* mice. Each lane represents an individual mouse.

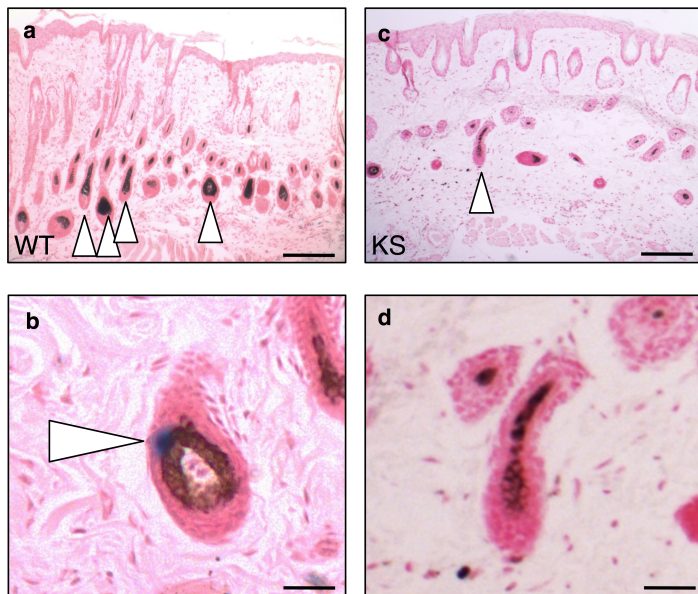

**Supplemental Figure 4. Attenuated depilation-induced anagen phase hair follicles in kallistatin transgenic mice.** Representative images of skin of three-month old littermates 7 days after depilation; **(a)** WT mouse skin, **(b)** detectable Wnt activity in anagen hair follicle (blue), **(c)** KS-TG mouse skin, **(d)** lack of detectable Wnt activity in certain hair follicles following depilation. Scale bars: (a, c) = 200  $\mu\text{m}$ ; (b, d) = 50  $\mu\text{m}$ .
